# Supplementary material for: Prediction of Clinical Remission with Adalimumab Therapy in Patients with Ulcerative Colitis by Fourier Transform–Infrared Spectroscopy Coupled with Machine Learning Algorithms
Source: MDPI journal article supplement (doi:10.3390/metabo14010002), 2023-12-19
Supplement: s1 [file s1]

**Table S2. Assignment of FT-IR spectra of fecal samples from patients with ulcerative colitis and healthy controls.**

| No. | Wavenumber (cm <sup>-1</sup> ) | Assignments                                 | Vibrational mode                                                                                  | Reference <sup>a)</sup> |
|-----|--------------------------------|---------------------------------------------|---------------------------------------------------------------------------------------------------|-------------------------|
| 1   | 3271                           | Amide A, proteins                           | N–H stretching                                                                                    | (1)                     |
| 2   | 3067                           | Amide B, proteins                           | N–H stretching                                                                                    | (1)                     |
| 3   | 2953                           | Lipids, proteins                            | CH <sub>3</sub> asymmetric stretch                                                                | (1)                     |
| 4   | 2918                           | Saturated lipids, side chain of proteins    | CH <sub>2</sub> asymmetric stretch                                                                | (1)                     |
| 5   | 2850                           | Saturated lipids and side chain of proteins | CH <sub>2</sub> symmetric stretch                                                                 | (1)                     |
| 6   | 1740                           | Triglycerides, glycerol esters              | Carbonyl C=O stretch                                                                              | (2)                     |
| 7   | 1629                           | Amide I, proteins                           | $\alpha$ -helical, $\beta$ -pleated sheet, $\beta$ -turns, random coils and side-chain structures | (3)                     |
| 8   | 1546                           | Amide II, proteins                          | N–H bend, C–N stretch                                                                             | (2)                     |
| 9   | 1437                           | Lipid                                       | CH <sub>2</sub> deformation                                                                       | (4)                     |
| 10  | 1408                           | Fatty acids, amino acids                    | COO <sup>-</sup> symmetric stretch                                                                | (1)                     |
| 11  | 1316                           | Amide III, proteins                         | C–H/N–H deformation vibrational modes methyl group                                                | (5)                     |
| 12  | 1244                           | DNA                                         | Asymmetric PO <sub>2</sub> <sup>-</sup> stretch                                                   | (1)                     |
| 13  | 1149                           | Carbohydrates                               | C–O stretching mode                                                                               | (6)                     |
| 14  | 1038                           | Carbohydrate, $\beta$ -anomer               | C–O stretching                                                                                    | (5)                     |

<sup>a)</sup> Detailed information on each reference used for spectral assignment is listed in the reference section below.
