# Supplementary material for: Prediction of Clinical Remission with Adalimumab Therapy in Patients with Ulcerative Colitis by Fourier Transform–Infrared Spectroscopy Coupled with Machine Learning Algorithms
Source: MDPI journal article supplement (doi:10.3390/metabo14010002), 2023-12-19
Supplement: s1 [file s1]

**Table S4. Comparison of absorbance intensity of major assigned spectral peaks from fecal samples in three types of discrimination models.**

| Wavenumber<br>(cm <sup>-1</sup> ) | UC vs. HC    |                        |                 | Wavenumber<br>(cm <sup>-1</sup> ) | RM vs. NRM (W8) |                         |                 | Wavenumber<br>(cm <sup>-1</sup> ) | RM vs. NRM (W56) |                         |                 |
|-----------------------------------|--------------|------------------------|-----------------|-----------------------------------|-----------------|-------------------------|-----------------|-----------------------------------|------------------|-------------------------|-----------------|
|                                   | VIP<br>value | Fold change<br>(UC/HC) | <i>p</i> -value |                                   | VIP<br>value    | Fold change<br>(RM/NRM) | <i>p</i> -value |                                   | VIP<br>value     | Fold change<br>(RM/NRM) | <i>p</i> -value |
| <b>3271.65</b>                    | 1.99         | 0.88(↓)                | <b>0.000*</b>   | <b>3067.23</b>                    | 1.46            | 0.95(↓)                 | <b>0.048*</b>   | <b>1740.92</b>                    | 1.46             | 2.50(↑)                 | <b>0.044*</b>   |
| <b>3271.16</b>                    | 1.99         | 0.88(↓)                | <b>0.000*</b>   | <b>3067.71</b>                    | 1.46            | 0.95(↓)                 | <b>0.048*</b>   | <b>1740.44</b>                    | 1.46             | 2.46(↑)                 | <b>0.043*</b>   |
| <b>1629.56</b>                    | 1.74         | 0.88(↓)                | <b>0.000*</b>   | 2953.45                           | 1.25            | 0.95(↓)                 | 0.180           | <b>1629.56</b>                    | 1.52             | 0.99(↓)                 | <b>0.014*</b>   |
| <b>1629.07</b>                    | 1.71         | 0.88(↓)                | <b>0.000*</b>   | 2953.93                           | 1.24            | 0.95(↓)                 | 0.188           | <b>1629.07</b>                    | 1.60             | 0.99(↓)                 | <b>0.019*</b>   |
| <b>1437.67</b>                    | 1.53         | 1.20(↑)                | <b>0.000*</b>   | 1740.44                           | 1.76            | 2.09(↑)                 | 0.226           | 1546.63                           | 1.12             | 0.93(↓)                 | 0.069           |
| <b>1437.19</b>                    | 1.55         | 1.20(↑)                | <b>0.000*</b>   | 1740.92                           | 1.74            | 2.06(↑)                 | 0.226           | 1546.15                           | 1.15             | 0.93(↓)                 | 0.076           |
| <b>1408.75</b>                    | 2.09         | 1.26(↑)                | <b>0.000*</b>   | 1316.18                           | 1.35            | 1.14(↑)                 | 0.086           | 1244.82                           | 1.23             | 1.10(↑)                 | 0.061           |
| <b>1408.26</b>                    | 2.09         | 1.26(↑)                | <b>0.000*</b>   | 1316.66                           | 1.33            | 1.14(↑)                 | 0.089           | 1244.34                           | 1.23             | 1.10(↑)                 | 0.060           |
| <b>1316.66</b>                    | 1.78         | 1.37(↑)                | <b>0.000*</b>   | <b>1244.34</b>                    | 1.68            | 1.23(↑)                 | <b>0.038*</b>   | <b>1149.37</b>                    | 2.72             | 1.24(↑)                 | <b>0.000*</b>   |
| <b>1316.18</b>                    | 1.78         | 1.38(↑)                | <b>0.000*</b>   | <b>1244.83</b>                    | 1.68            | 1.22(↑)                 | <b>0.038*</b>   | <b>1149.85</b>                    | 2.70             | 1.24(↑)                 | <b>0.000*</b>   |
| <b>1244.83</b>                    | 1.25         | 1.29(↑)                | <b>0.000*</b>   | <b>1149.37</b>                    | 1.60            | 1.21(↑)                 | <b>0.032*</b>   |                                   |                  |                         |                 |
| <b>1244.34</b>                    | 1.25         | 1.29(↑)                | <b>0.000*</b>   | <b>1149.85</b>                    | 1.60            | 1.21(↑)                 | <b>0.033*</b>   |                                   |                  |                         |                 |
| <b>1149.85</b>                    | 1.15         | 0.82(↓)                | <b>0.000*</b>   |                                   |                 |                         |                 |                                   |                  |                         |                 |
| <b>1149.37</b>                    | 1.17         | 0.82(↓)                | <b>0.000*</b>   |                                   |                 |                         |                 |                                   |                  |                         |                 |

HC, healthy controls; NRM, patient not in remission; RM, patient in remission; UC, ulcerative colitis; VIP, variable importance of projection; W8, baseline fecal samples from patients after 8 weeks of adalimumab treatment; W56, baseline fecal samples from patients after 56 weeks of adalimumab treatment.

Direction of comparison is UC/HC and RM/NRM with fold change threshold of 1.0. Significant differences between two groups are represented with asterisk mark (\*) ( $p < 0.05$ ) in student's *t* test. Bold characters represent selected wavenumbers satisfying both VIP value over 1.0 and *p*-value (student's *t* test) below 0.05.
