# Supplementary material for: Prediction of Clinical Remission with Adalimumab Therapy in Patients with Ulcerative Colitis by Fourier Transform–Infrared Spectroscopy Coupled with Machine Learning Algorithms
Source: MDPI journal article supplement (doi:10.3390/metabo14010002), 2023-12-19
Supplement: s1 [file s1]

**Table S3. Parameters of OPLS–DA models applying various normalization and scaling methods for discriminating baseline fecal samples in three comparison cases.**

| Models                 | Parameters                                    | Normalization methods |          |                 |                  |                 |
|------------------------|-----------------------------------------------|-----------------------|----------|-----------------|------------------|-----------------|
|                        |                                               | Area                  | Min-max  | Amide           | Vecto<br>r (1st) | Vector<br>(2nd) |
| HC vs. UC              | Scaling method                                | <b>Par</b>            | UV       | Par             | Par              | UV              |
|                        | Component number<br>(orthogonal + predictive) | <b>1+10</b>           | 1+11     | 1+8             | 1+8              | 1+5             |
|                        | R <sup>2</sup> Y                              | <b>0.890</b>          | 0.890    | 0.857           | 0.986            | 0.989           |
|                        | Q <sup>2</sup> Y                              | <b>0.870</b>          | 0.860    | 0.834           | 0.969            | 0.959           |
|                        | R <sup>2</sup> Y intercept                    | <b>0.119</b>          | 0.15     | 0.087           | 0.46             | 0.681           |
|                        | Q <sup>2</sup> Y intercept                    | <b>−0.258</b>         | −0.284   | −0.207          | −0.606           | −0.732          |
|                        | CV-ANOVA ( <i>p</i> -value)                   | <b>0</b>              | 0        | 0               | 0                | 0               |
| RM vs.<br>NRM (W8)     | Scaling method                                | <b>Par</b>            | Par      | UV              | Par              | UV              |
|                        | Component number<br>(orthogonal + predictive) | <b>1+21</b>           | 1+6      | 1+8             | 1+10             | 1+6             |
|                        | R <sup>2</sup> Y                              | <b>0.954</b>          | 0.504    | 0.553           | 0.985            | 0.981           |
|                        | Q <sup>2</sup> Y                              | <b>0.888</b>          | 0.408    | 0.457           | 0.947            | 0.915           |
|                        | R <sup>2</sup> Y intercept                    | <b>0.374</b>          | 0.118    | 0.158           | 0.606            | 0.786           |
|                        | Q <sup>2</sup> Y intercept                    | <b>−0.656</b>         | −0.211   | −0.277          | −0.801           | −0.659          |
|                        | CV-ANOVA ( <i>p</i> -value)                   | <b>0</b>              | 1.22E-13 | 1.34E-14        | 0                | 0               |
| RM vs.<br>NRM<br>(W56) | Scaling method                                | UV                    | UV       | <b>UV</b>       | UV               | UV              |
|                        | Component number<br>(orthogonal + predictive) | 1+7                   | 1+8      | <b>1+8</b>      | 1+8              | 1+6             |
|                        | R <sup>2</sup> Y                              | 0.402                 | 0.428    | <b>0.461</b>    | 0.983            | 0.983           |
|                        | Q <sup>2</sup> Y                              | 0.268                 | 0.274    | <b>0.327</b>    | 0.929            | 0.922           |
|                        | R <sup>2</sup> Y intercept                    | 0.156                 | 0.175    | <b>0.161</b>    | 0.699            | 0.783           |
|                        | Q <sup>2</sup> Y intercept                    | −0.247                | −0.271   | <b>−0.273</b>   | −0.712           | −0.661          |
|                        | CV-ANOVA ( <i>p</i> -value)                   | 3.69E−06              | 8.73E−06 | <b>6.05E−08</b> | 0                | 0               |

CV-ANOVA, cross validated-analysis of variance; HC, healthy controls; OPLS-DA, orthogonal partial least squares-discriminant analysis; UC, ulcerative colitis; UV, unit variance; RM, patients in remission; NRM, patients not in remission. W8, baseline fecal samples from patients after 8 weeks of adalimumab treatment; W56, baseline fecal samples from patients after 56 weeks of adalimumab treatment. Bold characters represent the best parameters of the selected model.
