# Supplementary material for: Prediction of Clinical Remission with Adalimumab Therapy in Patients with Ulcerative Colitis by Fourier Transform–Infrared Spectroscopy Coupled with Machine Learning Algorithms
Source: MDPI journal article supplement (doi:10.3390/metabo14010002), 2023-12-19
Supplement: s1 [file s1]

**Table S1. Institute and collection data information of samples from development and validation model.**

| Development model |                 |            |                 | Validation model |                 |            |                 |
|-------------------|-----------------|------------|-----------------|------------------|-----------------|------------|-----------------|
| Institutes        | Collection date | Institutes | Collection date | Institutes       | Collection date | Institutes | Collection date |
| A (6)             | 2015-06-05      | D (4)      | 2015-08-04      | I (1)            | 2015-06-23      | Q (11)     | 2015-09-24      |
|                   | 2015-10-28      |            | 2016-07-21      | J (1)            | 2017-01-03      |            | 2015-12-15      |
|                   | 2015-11-18      |            | 2016-12-26      | K (3)            | 2015-09-10      |            | 2015-12-22      |
|                   | 2016-06-14      | E (3)      | 2017-01-05      |                  | 2016-02-12      |            | 2015-12-17      |
|                   | 2016-06-16      |            | 2015-10-12      |                  | 2016-11-22      |            | 2015-12-29      |
|                   | 2017-01-03      |            | 2016-01-19      | L (6)            | 2015-12-08      |            | 2016-06-10      |
| B (8)             | 2015-06-29      | F (2)      | 2016-07-05      |                  | 2016-01-14      |            | 2016-06-21      |
|                   | 2015-07-27      |            | 2016-05-04      |                  | 2016-01-22      |            | 2016-06-24      |
|                   | 2015-11-17      |            | 2016-04-27      |                  | 2016-06-30      |            | 2016-06-18      |
|                   | 2016-03-08      | G (3)      | 2016-01-19      |                  | 2016-11-23      |            | 2016-08-23      |
|                   | 2016-04-07      |            | 2016-05-03      |                  | 2017-02-16      |            | 2017-02-21      |
|                   | 2016-10-31      |            | 2016-06-22      | M (1)            | 2016-11-11      |            |                 |
|                   | 2016-12-03      | H (5)      | 2015-07-03      | N (1)            | 2016-06-16      |            |                 |
|                   | 2017-06-03      |            | 2016-03-28      | O (2)            | 2016-07-26      |            |                 |
| C (3)             | 2015-09-09      |            | 2016-04-01      |                  | 2016-08-23      |            |                 |
|                   | 2016-10-11      |            | 2016-05-31      | P (2)            | 2016-05-27      |            |                 |
|                   | 2017-02-22      |            | 2017-02-08      |                  | 2017-03-07      |            |                 |

A, The Catholic University of Korea St. Vincent's Hospital; B, Chung-Ang University Hospital; C, Seoul National University Hospital; D, SNU Boramae Medical Center; E, Ewha Womans University Mokdong Hospital; F, Chosun University Hospital; G, Daejeon St. Mary's Hospital; H, Severance Hospital; I, Keimyung University Dongsan Medical Center; J, Korea University Anam Hospital; K, Inje University Seoul Paik Hospital; L, Inje University Haeundae Paik Hospital; M, Chonnam National University Hospital; N, Kangbuk Samsung Hospital; O, Inha University Hospital; P, Kyungpook National University Hospital; Q, KyungHee University Medical Center.
