# Supplementary material for: Prediction of Clinical Remission with Adalimumab Therapy in Patients with Ulcerative Colitis by Fourier Transform–Infrared Spectroscopy Coupled with Machine Learning Algorithms
Source: MDPI journal article supplement (doi:10.3390/metabo14010002), 2023-12-19
Supplement: s1 [file s1]

**Table S5. Comparison of 10-fold cross-validation performance, by various machine learning algorithms using baseline fecal samples, of the remission prediction model at 8 and 56 weeks of adalimumab treatment in patients with UC.**

| Week 8                                                                                                                                                                                                                                                                                                                                                                                      |                                                                                    | Accuracy            |                     | Precision           |                     | Recall              |                     | F1_score            |                     | ROC-AUC             |                     |
|---------------------------------------------------------------------------------------------------------------------------------------------------------------------------------------------------------------------------------------------------------------------------------------------------------------------------------------------------------------------------------------------|------------------------------------------------------------------------------------|---------------------|---------------------|---------------------|---------------------|---------------------|---------------------|---------------------|---------------------|---------------------|---------------------|
| Parameters                                                                                                                                                                                                                                                                                                                                                                                  |                                                                                    | Train               | Test                |
| Methods                                                                                                                                                                                                                                                                                                                                                                                     |                                                                                    |                     |                     |                     |                     |                     |                     |                     |                     |                     |                     |
| KNN                                                                                                                                                                                                                                                                                                                                                                                         | · K=3                                                                              | 0.99<br>(0.99–0.99) | 0.94<br>(0.89–0.99) | 0.99<br>(0.99–1.00) | 0.92<br>(0.79–1.05) | 0.96<br>(0.95–0.98) | 0.83<br>(0.70–0.97) | 0.98<br>(0.97–0.99) | 0.85<br>(0.75–0.96) | 0.98<br>(0.97–0.99) | 0.90<br>(0.83–0.97) |
| DT                                                                                                                                                                                                                                                                                                                                                                                          | · max_depth=6,                                                                     | 0.99<br>(0.99–1.00) | 0.88<br>(0.82–0.95) | 1.00                | 0.80<br>(0.62–0.99) | 0.99<br>(0.96–1.01) | 0.76<br>(0.56–0.96) | 0.99<br>(0.98–1.00) | 0.72<br>(0.56–0.89) | 0.99<br>(0.98–1)    | 0.84<br>(0.75–0.94) |
| RF                                                                                                                                                                                                                                                                                                                                                                                          | · n_estimators=200,<br>max_depth=4,<br>min_samples_leaf=8,<br>min_samples_split=20 | 0.94<br>(0.93–0.94) | 0.84<br>(0.79–0.89) | 1.00                | 0.84<br>(0.59–1.09) | 0.73<br>(0.70–0.77) | 0.41<br>(0.17–0.66) | 0.85<br>(0.82–0.87) | 0.47<br>(0.28–0.67) | 0.87<br>(0.85–0.88) | 0.70<br>(0.59–0.81) |
| linear SVM                                                                                                                                                                                                                                                                                                                                                                                  | · C=0.01                                                                           | 1.00                | 0.97<br>(0.94–1.01) | 1.00                | 0.94<br>(0.80–1.08) | 1.00                | 0.96<br>(0.89–1.02) | 1.00                | 0.93<br>(0.83–1.03) | 1.00                | 0.97<br>(0.93–1.01) |
| OPLS–DA                                                                                                                                                                                                                                                                                                                                                                                     | · Component number=1+21                                                            | 0.84<br>(0.79–0.90) | 0.82<br>(0.76–0.87) | 0.84<br>(0.78–0.90) | 0.81<br>(0.76–0.87) | 0.99<br>(0.99–1.00) | 0.99<br>(0.98–1.01) | 0.91<br>(0.88–0.94) | 0.89<br>(0.86–0.92) | 0.80<br>(0.68–0.92) | 0.76<br>(0.66–0.87) |
| Week 56                                                                                                                                                                                                                                                                                                                                                                                     |                                                                                    | Accuracy            |                     | Precision           |                     | Recall              |                     | F1_score            |                     | ROC-AUC             |                     |
| Parameters                                                                                                                                                                                                                                                                                                                                                                                  |                                                                                    | Train               | Test                |
| Methods                                                                                                                                                                                                                                                                                                                                                                                     |                                                                                    |                     |                     |                     |                     |                     |                     |                     |                     |                     |                     |
| LR                                                                                                                                                                                                                                                                                                                                                                                          | · C=1000                                                                           | 1.00                | 0.96<br>(0.9–1.02)  | 1.00                | 0.96<br>(0.87–1.05) | 1.00                | 0.96<br>(0.88–1.05) | 1.00                | 0.95<br>(0.88–1.02) | 1.00                | 0.97<br>(0.91–1.02) |
| KNN                                                                                                                                                                                                                                                                                                                                                                                         | · K=3                                                                              | 0.99<br>(0.99–1.00) | 0.96<br>(0.92–1.00) | 0.99<br>(0.99–1.00) | 0.95<br>(0.87–1.03) | 0.98<br>(0.98–0.99) | 0.96<br>(0.92–1.01) | 0.99<br>(0.98–0.99) | 0.95<br>(0.89–1.01) | 0.99<br>(0.98–0.99) | 0.97<br>(0.93–1.00) |
| DT                                                                                                                                                                                                                                                                                                                                                                                          | · max_depth=5                                                                      | 0.98<br>(0.96–1.01) | 0.88<br>(0.83–0.93) | 1.00                | 0.92<br>(0.86–0.98) | 0.96<br>(0.91–1.02) | 0.81<br>(0.69–0.92) | 0.98<br>(0.95–1.01) | 0.85<br>(0.77–0.92) | 0.98<br>(0.95–1.01) | 0.87<br>(0.82–0.93) |
| RF                                                                                                                                                                                                                                                                                                                                                                                          | · n_estimators=100,<br>max_depth=4,<br>min_samples_leaf=8,<br>min_samples_split=8  | 0.97<br>(0.97–0.98) | 0.85<br>(0.80–0.90) | 1.00                | 1.00                | 0.94<br>(0.92–0.96) | 0.65<br>(0.56–0.74) | 0.97<br>(0.96–0.98) | 0.78<br>(0.72–0.85) | 0.97<br>(0.96–0.98) | 0.83<br>(0.78–0.87) |
| linear SVM                                                                                                                                                                                                                                                                                                                                                                                  | · C=0.1                                                                            | 1.00                | 0.96<br>(0.91–1.01) | 1.00                | 0.97<br>(0.89–1.04) | 1.00                | 0.95<br>(0.86–1.03) | 1.00                | 0.95<br>(0.88–1.01) | 1.00                | 0.96<br>(0.91–1.01) |
| OPLS–DA                                                                                                                                                                                                                                                                                                                                                                                     | · Component number=1+7                                                             | 0.76<br>(0.72–0.80) | 0.70<br>(0.63–0.76) | 0.75<br>(0.72–0.78) | 0.71<br>(0.66–0.76) | 0.90<br>(0.86–0.93) | 0.80<br>(0.71–0.90) | 0.82<br>(0.78–0.85) | 0.75<br>(0.69–0.81) | 0.79<br>(0.73–0.85) | 0.75<br>(0.68–0.81) |
| DT, decision tree; KNN, K-nearest neighbors; LR, logistic regression; OPLS–DA, orthogonal partial least squares–discriminant analysis; rbf, radial basis function; RF, random forest; ROC–AUC, receiver operating characteristic-area under the curve; SVM, support vector machine; UC, ulcerative colitis. LR, KNN, DT, RF, and SVM were performed by SciKit-Learn software and parameters |                                                                                    |                     |                     |                     |                     |                     |                     |                     |                     |                     |                     |

---

were selected by the function of “GridSearchCV” in SciKit-Learn software. OPLS–DA was performed using SIMCA software, and the parameters were selected using the “autofit” function in SIMCA. 95% confidence intervals are presented within parentheses.

---
