# Supplementary material for: Prediction of Clinical Remission with Adalimumab Therapy in Patients with Ulcerative Colitis by Fourier Transform–Infrared Spectroscopy Coupled with Machine Learning Algorithms
Source: MDPI journal article supplement (doi:10.3390/metabo14010002), 2023-12-19
Supplement: s1 [file s1]

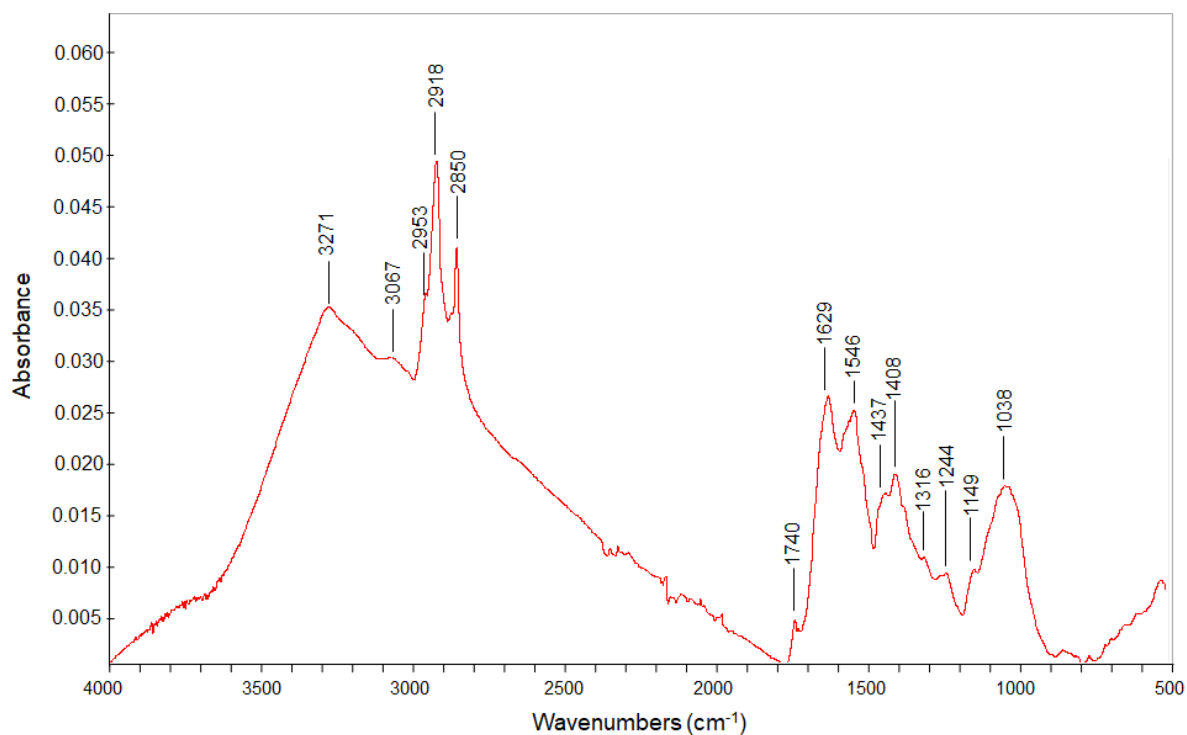

**Figure S1. Averaged Fourier transform-infrared (FT-IR) spectrum of baseline fecal samples from healthy controls and patients with ulcerative colitis.**
