# Supplementary material for: Prediction of Clinical Remission with Adalimumab Therapy in Patients with Ulcerative Colitis by Fourier Transform–Infrared Spectroscopy Coupled with Machine Learning Algorithms
Source: MDPI journal article supplement (doi:10.3390/metabo14010002), 2023-12-19
Supplement: s1 [file s1]

**Table S6. Comparison of prediction performance of the remission prediction model at 8 and 56 weeks of adalimumab treatment in patients with ulcerative colitis by various ML algorithms in internal and external validation process.**

| Week 8     | Development model (10F-cross validation) |                     |                     |                     |                     |                     |                     |                     |                     |                     | Validation model |           |        |          |         |
|------------|------------------------------------------|---------------------|---------------------|---------------------|---------------------|---------------------|---------------------|---------------------|---------------------|---------------------|------------------|-----------|--------|----------|---------|
|            | Train                                    |                     |                     |                     |                     | Test                |                     |                     |                     |                     | Accuracy         | Precision | Recall | F1_score | ROC-AUC |
|            | Methods                                  | Accuracy            | Precision           | Recall              | F1_score            | ROC-AUC             | Accuracy            | Precision           | Recall              | F1_score            |                  |           |        |          |         |
| KNN        | 0.99<br>(0.99-1.00)                      | 1.00                | 0.96<br>(0.94-0.98) | 0.98<br>(0.97-0.99) | 0.98<br>(0.97-0.99) | 0.96<br>(0.91-1.01) | 0.98<br>(0.93-1.03) | 0.91<br>(0.79-1.03) | 0.93<br>(0.86-1.01) | 0.95<br>(0.89-1.01) | 0.454            | 0.450     | 0.450  | 0.450    | 0.380   |
| DT         | 0.94<br>(0.92-0.97)                      | 0.87<br>(0.79-0.95) | 0.91<br>(0.88-0.93) | 0.89<br>(0.84-0.93) | 0.93<br>(0.91-0.95) | 0.9<br>(0.84-0.95)  | 0.86<br>(0.73-1.00) | 0.75<br>(0.55-0.95) | 0.75<br>(0.61-0.89) | 0.85<br>(0.76-0.94) | 0.424            | 0.560     | 0.420  | 0.410    | 0.560   |
| RF         | 0.96<br>(0.94-0.97)                      | 0.99<br>(0.98-1.01) | 0.83<br>(0.76-0.90) | 0.90<br>(0.86-0.94) | 0.91<br>(0.88-0.95) | 0.85<br>(0.79-0.91) | 0.95<br>(0.84-1.06) | 0.45<br>(0.28-0.62) | 0.58<br>(0.44-0.73) | 0.72<br>(0.64-0.81) | 0.454            | 0.420     | 0.450  | 0.430    | 0.460   |
| linear SVM | 1.00                                     | 1.00                | 1.00                | 1.00                | 1.00                | 1.00                | 1.00                | 1.00                | 1.00                | 1.00                | 0.636            | 0.640     | 0.640  | 0.620    | 0.750   |
| rbf SVM    | 1.00                                     | 1.00                | 1.00                | 1.00                | 1.00                | 1.00                | 1.00                | 1.00                | 1.00                | 1.00                | 0.545            | 0.520     | 0.550  | 0.530    | 0.440   |
| Week 56    | Development model (10F-cross validation) |                     |                     |                     |                     |                     |                     |                     |                     |                     | Validation model |           |        |          |         |
|            | Train                                    |                     |                     |                     |                     | Test                |                     |                     |                     |                     | Accuracy         | Precision | Recall | F1_score | ROC-AUC |
|            | Methods                                  | Accuracy            | Precision           | Recall              | F1_score            | ROC-AUC             | Accuracy            | Precision           | Recall              | F1_score            |                  |           |        |          |         |
| LR         | 1.00                                     | 1.00                | 1.00                | 1.00                | 1.00                | 0.97<br>(0.95-1.00) | 0.99<br>(0.97-1.01) | 0.96<br>(0.92-1.01) | 0.97<br>(0.95-1.00) | 0.97<br>(0.95-1.00) | 0.606            | 0.580     | 0.610  | 0.560    | 0.580   |
| KNN        | 0.99<br>(0.98-0.99)                      | 1.00<br>(0.99-1.00) | 0.98<br>(0.97-0.99) | 0.99<br>(0.98-0.99) | 0.99<br>(0.98-0.99) | 0.94<br>(0.89-0.98) | 0.97<br>(0.91-1.02) | 0.9<br>(0.8-1.00)   | 0.92<br>(0.86-0.99) | 0.93<br>(0.87-0.98) | 0.667            | 0.650     | 0.670  | 0.660    | 0.590   |
| RF         | 0.99<br>(0.98-0.99)                      | 0.99<br>(0.99-1.00) | 0.97<br>(0.95-0.98) | 0.98<br>(0.98-0.99) | 0.98<br>(0.98-0.99) | 0.9<br>(0.84-0.96)  | 0.98<br>(0.91-1.04) | 0.83<br>(0.71-0.95) | 0.88<br>(0.81-0.95) | 0.90<br>(0.85-0.96) | 0.545            | 0.490     | 0.550  | 0.500    | 0.310   |
| linear SVM | 1.00                                     | 1.00                | 1.00                | 1.00                | 1.00                | 0.97<br>(0.95-1.00) | 0.99<br>(0.97-1.01) | 0.96<br>(0.92-1.01) | 0.97<br>(0.95-1.00) | 0.97<br>(0.95-1.00) | 0.636            | 0.610     | 0.640  | 0.600    | 0.640   |
| rbf SVM    | 1.00                                     | 1.00                | 1.00                | 1.00                | 1.00                | 0.98<br>(0.93-1.03) | 1.00                | 0.96<br>(0.88-1.05) | 0.98<br>(0.92-1.03) | 0.98<br>(0.94-1.02) | 0.545            | 0.530     | 0.550  | 0.490    | 0.520   |

95% confidence interval was indicated within parenthesis with the parameter values in development model. DT, decision tree; KNN, K-nearest neighbors; LR, logistic regression; rbf, radial basis function; RF, random forest; ROC-AUC, receiver operating characteristic-area under the curve; SVM, support vector machine; UC, ulcerative colitis. LR, KNN, DT, RF, and SVM were performed by SciKit-Learn software and parameters were selected by the function of “GridSearchCV” in SciKit-Learn software.
